# Supplementary material
Source: Springer Nature journal article supplement (https://www.springermedizin.de/resource/supplementary/13737_2012_16_MOESM6_ESM.pdf/9682082)

Shapiro (2003) Protocol

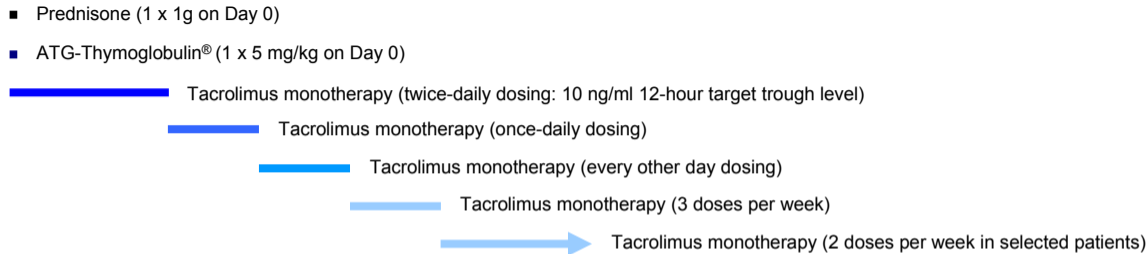

Rejection (%)

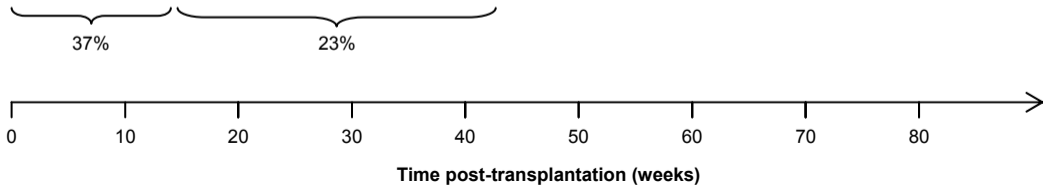

Supplement: MOESM6 [file 9682082]
